# Supplementary material for: Formation of Au nanoparticles in an ionic liquid by electron beam irradiation
Source: Royal Society of Chemistry journal article supplement (doi:10.1039/b821303h), 2009-01-01
Supplement: b821303h.pdf [file b821303h.pdf]

## Electronic Supplementary Information

### Formation of Au nanoparticles in ionic liquid by electron beam irradiation

Akihito Imanishi,<sup>\*a,c</sup> Masaaki Tamura<sup>a</sup> and Susumu Kuwabata<sup>b,c</sup>

<sup>a</sup> Department of Chemistry, Graduate School of Engineering Science, Osaka University, Toyonaka, Osaka, 560-8531, Japan . Fax: +81-6-6850-6237; Tel: +81-6-6850-6237; E-mail: imanishi@chem.es.osaka-u.ac.jp

<sup>b</sup> Department of Applied Chemistry, Graduate School of Engineering, Osaka University, Suita, Osaka, 565-0871, Japan; E-mail: kuwabata@chem.eng.osaka-u.ac.jp

<sup>c</sup> CREST, JST, Kawaguchi, Saitama 332-0012, Japan.

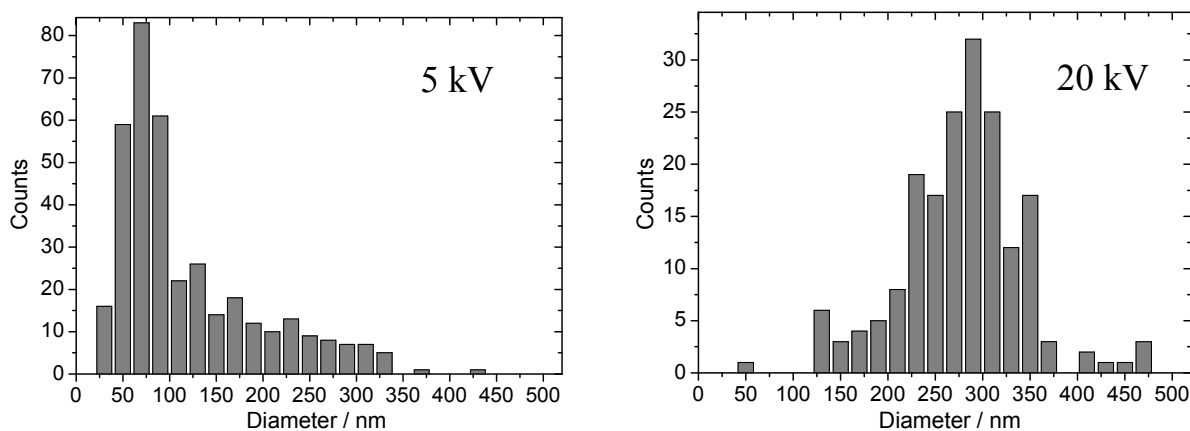

**Fig. S1** Size distribution of Au nanoparticles on FTO substrate formed by electron beam irradiation for 10 min. The acceleration energy for electron beam is 5kV (left) and 20 kV (right), respectively. The beam current was  $1 \times 10^{-8}$  A in both cases.
